# Supplementary figures and images for: The Associations between Paraoxonase 1 L55M/Q192R Genetic Polymorphisms and the Susceptibilities of Diabetic Macroangiopathy and Diabetic Microangiopathy: A Meta-Analysis
Source: Springer Nature journal article supplement (doi:10.1007/s13300-018-0466-5), 2018-07-09

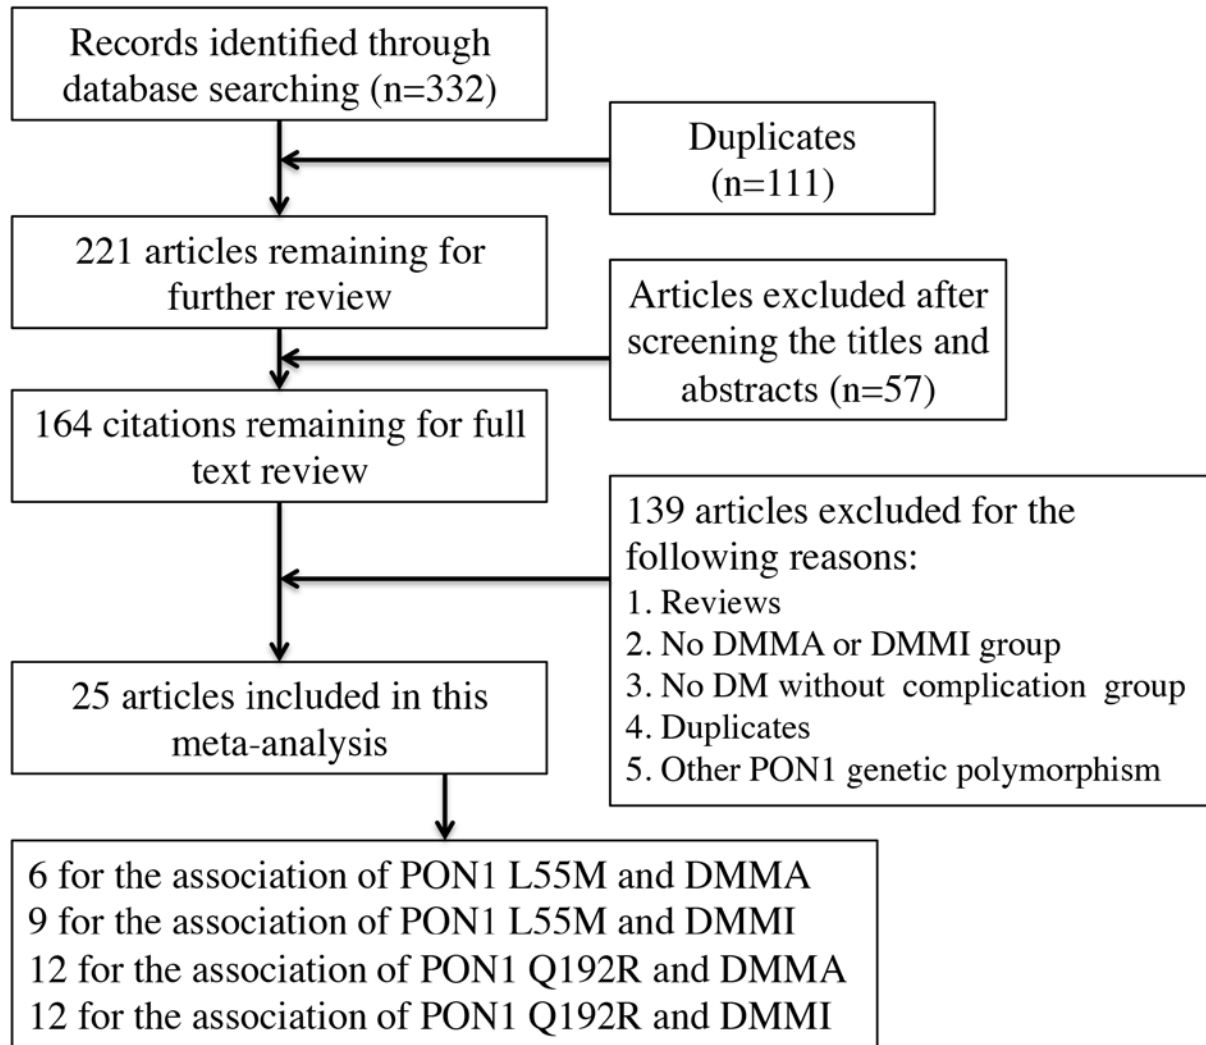

**Figure S1** Flow diagram of the search strategy and study selection.

Supplement: MOESM1 [file 15927624]
